# Supplementary material
Source: publisher site journal article supplement (https://www.dovepress.com/article/306808)
Supplement: Supplementary file 1 [file get_supplementary_file.php]

**Supplementary data**

**Influence of apnea-hypopnea index (AHI) on performance**

The apnea-hypopnea index (AHI) is an index used to indicate the severity of obstructive sleep apnea (OSA). Individual apneic events have impact on hemodynamics and it has been demonstrated that repetitive episodes of apneas trigger fluctuations in heart rate with consequent effects on the estimates of cardiovascular variability.1 Our results show a weak Spearman’s rank correlation between AHI and κ (ρ = -0.21, p=0.001), suggesting a lower performance as AHI increases. No significant correlation was found between AHI and accuracy. These results demonstrate only a minor effect of AHI on performance, indicating that our classifier can be used in patients with different severities of OSA without a priori knowledge of their condition.

**Performance in children/adolescents**

For the children/adolescents, the algorithm achieved an average κ of 0.66 ± 0.09 and accuracy of 77.9% ± 6.5% (Table S1) for 4-class sleep staging, which is higher compared to the performance in the entire cohort.

**Table S1 Epoch-per-epoch agreement for children/adolescents**

| Task | κ (-) | Accuracy (%) | Sensitivity (%) | Specificity (%) | PPV (%) |
| --- | --- | --- | --- | --- | --- |
| Wake/N1+N2/N3/REM | 0.66 ± 0.09 | 77.9 ± 6.5 | n/a | n/a | n/a |
| Wake/NREM/REM | 0.71 ± 0.10 | 87.3 ± 3.7 | n/a | n/a | n/a |
| Wake (vs. Sleep) | 0.66 ± 0.16 | 93.7 ± 2.8 | 74.8 ± 17.3 | 95.5 ± 3.2 | 68.5 ± 19.1 |
| N1+N2 | 0.56 ± 0.12 | 78.5 ± 6.0 | 78.0 ± 7.3 | 79.1 ± 9.5 | 77.2 ± 13.7 |
| N3 | 0.70 ± 0.13 | 90.4 ± 5.0 | 74.4 ± 18.1 | 95.3 ± 4.2 | 81.9 ± 13.1 |
| REM | 0.73 ± 0.13 | 93.1 ± 3.4 | 80.9 ± 13.4 | 95.3 ± 3.2 | 74.8 ± 13.8 |

κ: Kappa; PPV: positive predictive value

**Performance in patients with Non-REM parasomnia**

A detailed look at the classification for Non-REM parasomnias showed an increased performance compared with the overall performance for four- and three-class classification (Table S2). This was associated with an increase for almost all metrics for all classes, and particularly with an increase in κ for N3 (from 0.58 in the entire cohort to 0.70 for patients with a Non-REM parasomnia). It could be that no parasomnia event occurred during the recording night, and that these patients had a relatively normal sleep pattern, comparable to a healthy person of the same age, which makes it possibly easier to perform sleep staging. It is also noteworthy that the patient in the non-REM parasomnia group were younger compared to the overall validation dataset, with an average age of 24.8 ranging from 3 to 54 years.

**Table S2 Performance for patients with Non-REM parasomnia**

| Task | κ (-) | Accuracy (%) | Sensitivity (%) | Specificity (%) | PPV (%) |
| --- | --- | --- | --- | --- | --- |
| Wake/N1+N2/N3/REM | 0.69 ± 0.07 | 80.1 ± 4.3 | n/a | n/a | n/a |
| Wake/NREM/REM | 0.74 ± 0.06 | 88.5 ± 2.4 | n/a | n/a | n/a |
| Wake (vs. Sleep) | 0.69 ± 0.11 | 94.9 ± 2.6 | 75.9 ± 14.5 | 96.4 ± 3.7 | 71.7 ± 13.5 |
| N1+N2 | 0.61 ± 0.08 | 80.6 ± 4.1 | 79.7 ± 7.8 | 81.4 ± 4.8 | 81.9 ± 5.4 |
| N3 | 0.70 ± 0.11 | 91.5 ± 3.4 | 75.8 ± 16.0 | 95.0 ± 4.2 | 79.4 ± 14.5 |
| REM | 0.77 ± 0.06 | 93.2 ± 2.4 | 83.6 ± 8.9 | 95.1 ± 2.5 | 79.1 ± 8.3 |

κ: Kappa; PPV: positive predictive value

**Performance in patients with REM-parasomnia**

The performance of the algorithm was lower in patients with REM parasomnias. There was a decrease for all metrics, but the most negatively impacted class was REM, with a substantial decrease in sensitivity and κ (Table S3). A potential reason for this is the presence of comorbid autonomic dysfunction, as explained by Fonseca et al.2 Another reason might be the fact that human inter-rater-agreement is lower for REM sleep and wake in patients with a REM behavior disorder, suggesting less reliable comparison with ground-truth PSG.3

**Table S3 Confusion matrix for patients with REM parasomnia**

| Pred. 🡪  Ref. ↓ | Wake | N1+N2 | N3 | REM | Prev. (%) | Sens. (%) | κ (-) |
| --- | --- | --- | --- | --- | --- | --- | --- |
| Wake | 3030 (18.2%/69.3%) | 1164 (7.0%/26.6%) | 17 (0.1%/0.4%) | 160 (1.0%/3.7%) | 4371 (26.3) | 69.3 | 0.65 |
| N1+N2 | 713 (4.3%/8.6%) | 6444 (38.8%/77.5%) | 694 (4.2%/8.4%) | 460 (2.8%/5.5%) | 8311 (50.0) | 77.5 | 0.49 |
| N3 | 36 (0.2%/1.7%) | 751 (4.5%/36.1%) | 1288 (7.8%/62.0%) | 3 (0.02%/0.1%) | 2078 (12.5) | 62.0 | 0.58 |
| REM | 107 (0.6%/5.8%) | 470 (2.8%/25.4%) | 3 (0.02%/0.2%) | 1271 (7.7%/68.7%) | 1851 (11.1) | 68.7 | 0.64 |
| PPV(%) | 78.0% | 73.0% | 64.3% | 67.1% |  |  |  |

Each cell contains the number of epochs for all classes according to the sleep stages identified by the algorithm (“*Pred.*”) and ground truth PSG (“*Ref.*”). In addition, between parentheses, the percentage relative to the total number of epochs of all classes is listed, followed by the percentage relative to the total number of epochs with the corresponding reference sleep stage, as estimated with PSG, for that row.

Prev.: prevalence; Sens.: sensitivity; PPV: positive predictive value

**Performance in patients with insomnia**

The ability to accurately detect wake is important in patients with sleep disorders, especially in patients with insomnia. The use of actigraphy in this group is problematic due to its main limitation: its low ability to correctly detect wake (low sensitivity to wake or low specificity to sleep). Patients with insomnia often lie awake in bed motionless, where the classifier is being “fooled” and identifies motionless periods incorrectly as sleep.4–6 Taking a look at recent published literature (see Table S5), Kahawage et al. validated both actigraphy and a consumer wearable in patients with insomnia. They reported an accuracy to detect wake of 91.0% and 81.1%, and specificity to detect sleep (or sensitivity to detect wake) of 39.09% and 44.76% for actigraphy and the consumer wearable, respectively.7 A study by Marino at al. showed an accuracy of 83.3% and sensitivity to wake of 34.7% obtained with actigraphy in insomnia patients.8

The addition of PPG measurements on motion-based measurements enables us to derive HRV features that depend on autonomic activity. Since autonomic nervous system activity cannot be “fooled”, it will help the classifier to detect wake in these motionless periods. This important addition is emphasized in our study by a relatively high agreement on Wake/Sleep classification and the detection of wake with a sensitivity of 75.3% in patients with insomnia, as reported in Table S4.

**Table S4 Performance for patients with insomnia**

| Task | κ (-) | Accuracy (%) | Sensitivity (%) | Specificity (%) |
| --- | --- | --- | --- | --- |
| Wake (vs. Sleep) | 0.68 ± 0.12 | 91.0 ± 5.1 | 75.3 ± 16.4 | 94.0 ± 6.9 |
| N1+N2 | 0.55 ± 0.12 | 78.1 ± 6.4 | 77.7 ± 9.4 | 77.9 ± 11.1 |
| N3 | 0.60 ± 0.26 | 91.6 ± 5.0 | 72.8 ± 24.0 | 94.8 ± 5.3 |
| REM | 0.68 ± 0.18 | 93.5 ± 3.1 | 76.5 ± 22.6 | 95.7 ± 3.1 |

**Overview of recent published literature on automatic sleep staging**

Table S5 gives an overview of recently published literature on automatic sleep staging using different devices. We included studies using PPG signals and accelerometer data, similar to our work and studies using exclusively PPG signals. In addition, we included studies using clinically accepted actigraphy, which measures solely accelerometer data, and widely available sleep trackers used by a substantial amount of today’s population.

**Table S5 Overview of recently published research on sleep staging using photoplethysmography (PPG) data, actigraphy or consumer wearables**

| **Type of data/device** | **Year of publication** | **Authors** | **Sample characteristics** | **Type of sleep staging** | **Results** |
| --- | --- | --- | --- | --- | --- |
| **Raw PPG and accelerometer data** | | | | | |
| Apple Watch | 2019 | Walch et al9 | 39 healthy adults  Age: 29.42 ± 8.52 years  Range 19.0 to 55.0 | Three class | κ = 0.3  Accuracy = 72% |
| Two class | Accuracy = 90%  Specificity* = 59.6% |
| Philips CE-marked logging device | 2017 | Fonseca et al10 | 51 healthy adults  Age: 51.6 ± 7.7 years  Range 41 to 66 | Four class | κ = 0.42  Accuracy = 59.3% |
| Three class | κ = 0.46  Accuracy = 72.9% |
| Two class | κ = 0.55  Accuracy = 91.5% |
| Fitbit Surge | 2017 | Beattie et al11 | 60 adults (self-reported normal sleepers)  Age: 34 ± 10 years  Range 19 to 60 years | Four class | κ = 0.52  Accuracy = 69% |
| **Raw PPG data** | | | | | |
| Transmissive PPG data from a finger pulse oximeter | 2020 | Korkalainen et al12 | 894 patients suspected of OSA  Age: 56.1 (45.3 – 63.3) (median (IQR) | Five class | κ = 0.51  Accuracy = 64.1% |
| Four class | κ = 0.54  Accuracy = 68.5% |
| Three class | κ = 0.65  Accuracy = 80.1% |
| PPG data from optical wrist heart rate monitor (PulseOn Ltd) | 2019 | Molkkari et al13 | 18 healthy adults  Age: 28 years (average)  Range 21 to 42 years | Five class | κ = 0.35  Accuracy = 54.2% |
| Four class | κ = 0.38  Accuracy = 60.1% |
| Three class | κ = 0.43  Accuracy = 72.5% |
| **Actigraphya** | | | | | |
| Actiwatch Spectrum Pro | 2020 | Kahawage et al7 | 42 adults with insomnia  Age: 49.14 ± 17.54  Range 19 to 82 | Two class | κ** = 0.66  Accuracy = 81.1%  Specificity* = 39.09% |
| Actiwatch 2 | 2018 | Pesonen et al14 | 17 healthy children  Age: 11.0 ± 0.8 years  Range: 9.9 to 12.6 years  17 healthy adolescents  Age: 17.8 ± 1.8 years  Range 14.4 to 19.8 years | Two class | *In children*  Accuracy = 90%  Specificity* = 68%  *In adolescents*  Accuracy = 89%  Specificity* = 58% |
| AW-64 | 2013 | Marino et al.8 | Total of 77 participants including: people with insomnia, healthy participants, older adults, healthy sleep-restricted participants and night workers  Age: 45.0 ± 12.5 years  17 patients with insomnia  Age: 40.5 ± 8.2 years | Two class | *In participants without insomnia*  Accuracy = 86.9%  Specificity* = 33.1%  *In insomnia patients*  Accuracy = 83.3%  Specificity* = 34.7% |
| Actiwatch Spectrum |
| **Consumer wearablesa** | | | | | |
| Fatigue Science Readiband | 2021 | Chinoy et al15 | 34 healthy adults  Age: 28.1 ± 3.9 | Two class | Accuracy = 88%  Specificity = 45% |
| Fitbit Alta HR | Accuracy = 90%  Specificity = 54% |
| Garmin Fenix 5S | Accuracy = 88%  Specificity = 18% |
| Garmin Vivosmart3 | Accuracy = 88%  Specificity = 19% |
| Fitbit Alta HR | 2020 | Kahawage et al7 | 42 adults with insomnia  Age: 49.14 ± 17.54 years  Range 19 to 82 years | Two class | κ** = 0.58  Accuracy = 82.8%  Specificity* = 44.76% |
| Fitbit Charge HR | 2020 | Godino et al16 | 19 healthy children  Age: 9.9 ± 0.7 years  Range 9 to 11 years | Two class | κ = 0.53  Accuracy = 92.1%  Specificity* = 56.9% |
| Fitbit Charge 2 and Fitbit Charge HR | 2019 | Moreno-Pino et al17 | 65 adults from which 55 with OSA  Age: 58.84 ± 13.84 years  Range 22 to 85 years | Two class | Specificity* = 43.85% |
| Polar Fitness Tracker | 2018 | Pesonen et al14 | 17 healthy children  Age: 11.0 ± 0.8 years  Range: 9.9 to 12.6 years  17 healthy adolescents  Age: 17.8 ± 1.8 years  Range 14.4 to 19.8 years | Two class | *In children*  Accuracy = 91%  Specificity* = 77%  *In adolescents*  Accuracy = 90%  Specificity* = 83% |

*Please note that the referenced papers used the term ‘specificity’ with wake defined as the negative class. In our results we use term ‘sensitivity’ with wake as the positive class, so the terms are referring to the same outcome.

** Weighted kappa score

aThis includes only a limited selection of recent published literature

**Bland-Altman plots for the sleep statistics for both adults and children/adolescents**

**
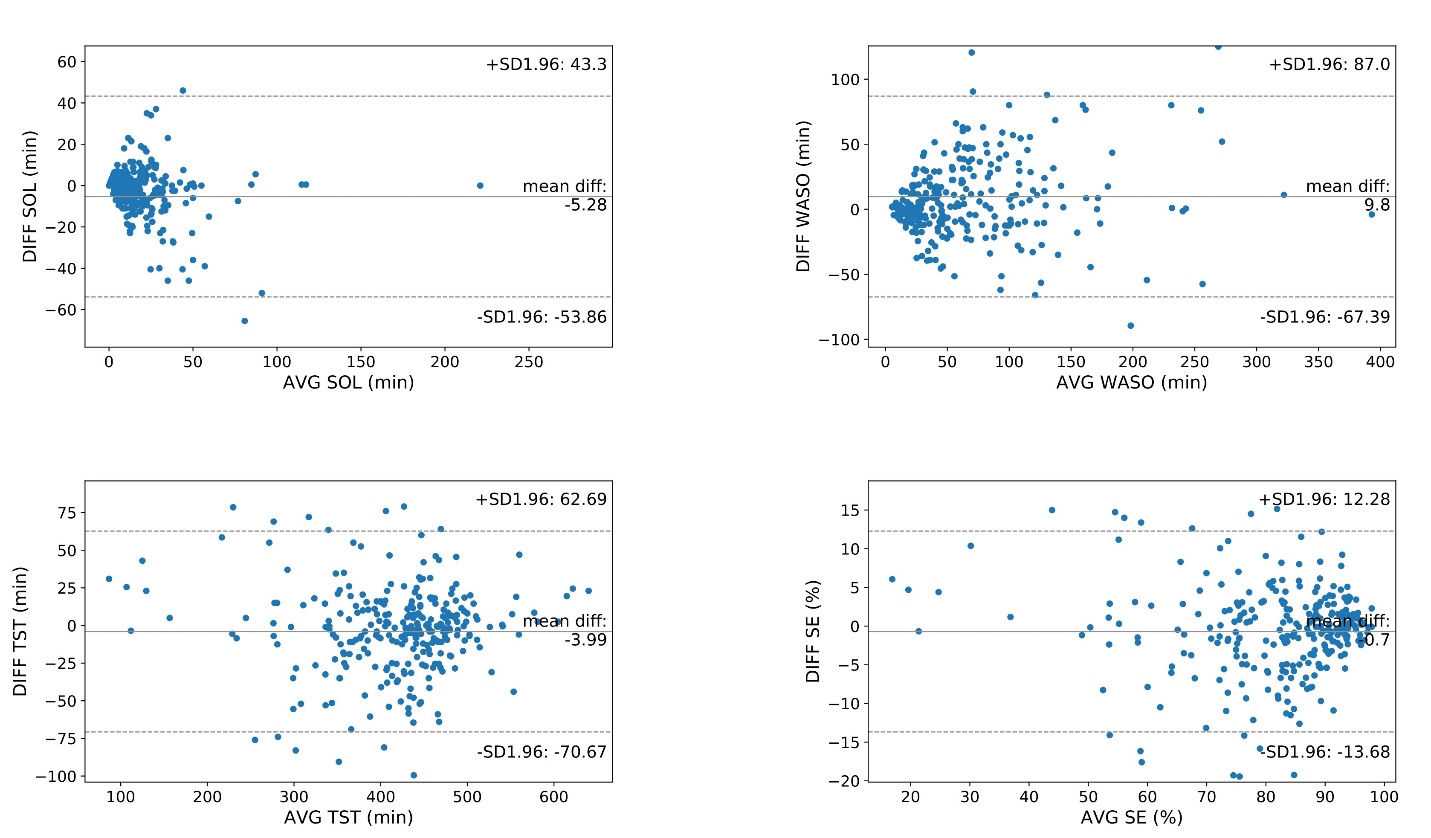
**

**Figure S1 Bland-Altman plots for the sleep statistics for both adults and children/adolescents.**

SOL: sleep onset latency; WASO: wake after sleep onset; TST: total sleep time; SE: sleep efficiency

**References supplementary data**

1. Somers VK, Dyken ME, Clary MP, Abboud FM. Sympathetic neural mechanisms in obstructive sleep apnea. *J Clin Invest*. 1995;96(4):1897-1904. doi:10.1172/JCI118235

2. Fonseca P, Gilst MM van, Radha M, et al. Automatic sleep staging using heart rate variability, body movements and recurrent neural networks in a sleep disordered population. *Sleep*. Published online 2020. doi:10.1093/sleep/zsaa048

3. Bliwise DL, Williams ML, Irbe D, Ansari FP, Rye DB. Inter-rater Reliability for Identification of REM Sleep in Parkinson’s Disease. *Sleep*. 2000;23(5):1-6. doi:10.1093/sleep/23.5.1j

4. Hauri PJ, Wisbey J. Wrist actigraphy in insomnia. *Sleep*. 1992;15(4):293-301. doi:10.1093/sleep/15.4.293

5. Sadeh A, Hauri PJ, Kripke DF, Lavie P. The Role of Actigraphy in the Evaluation of Sleep Disorders. *Sleep*. 1995;18(4):288-302. doi:10.1093/sleep/18.4.288

6. Long X, Fonseca P, Haakma R, Aarts RM. Actigraphy-based sleep/wake detection for insomniacs. In: *2017 IEEE 14th International Conference on Wearable and Implantable Body Sensor Networks (BSN)*. ; 2017:1-4. doi:10.1109/BSN.2017.7935711

7. Kahawage P, Jumabhoy R, Hamill K, Zambotti M, Drummond SPA. Validity, potential clinical utility, and comparison of consumer and research‐grade activity trackers in Insomnia Disorder I: In‐lab validation against polysomnography. *J Sleep Res*. 2020;29(1). doi:10.1111/jsr.12931

8. Marino M, Li Y, Rueschman MN, et al. Measuring Sleep: Accuracy, Sensitivity, and Specificity of Wrist Actigraphy Compared to Polysomnography. *Sleep*. 2013;36(11):1747-1755. doi:10.5665/sleep.3142

9. Walch O, Huang Y, Forger D, Goldstein C. Sleep stage prediction with raw acceleration and photoplethysmography heart rate data derived from a consumer wearable device. *Sleep*. 2019;42(12). doi:10.1093/sleep/zsz180

10. Fonseca P, Weysen T, Goelema MS, et al. Validation of Photoplethysmography-Based Sleep Staging Compared With Polysomnography in Healthy Middle-Aged Adults. *Sleep*. 2017;40(7). doi:10.1093/sleep/zsx097

11. Beattie Z, Oyang Y, Statan A, et al. Estimation of sleep stages in a healthy adult population from optical plethysmography and accelerometer signals. *Physiol Meas*. 2017;38(11):1968-1979. doi:10.1088/1361-6579/aa9047

12. Korkalainen H, Aakko J, Duce B, et al. Deep learning enables sleep staging from photoplethysmogram for patients with suspected sleep apnea. *Sleep*. doi:10.1093/sleep/zsaa098

13. Molkkari M, Tenhunen M, Tarniceriu A, Vehkaoja A, Himanen S-L, Räsänen E. Non-Linear Heart Rate Variability Measures in Sleep Stage Analysis with Photoplethysmography. In: ; 2019. doi:10.22489/CinC.2019.287

14. Pesonen A-K, Kuula L. The Validity of a New Consumer-Targeted Wrist Device in Sleep Measurement: An Overnight Comparison Against Polysomnography in Children and Adolescents. *J Clin Sleep Med JCSM Off Publ Am Acad Sleep Med*. 2018;14(4):585-591. doi:10.5664/jcsm.7050

15. Chinoy ED, Cuellar JA, Huwa KE, et al. Performance of Seven Consumer Sleep-Tracking Devices Compared with Polysomnography. *Sleep*. Published online 2021. doi:10.1093/sleep/zsaa291

16. Godino JG, Wing D, Zambotti M de, et al. Performance of a commercial multi-sensor wearable (Fitbit Charge HR) in measuring physical activity and sleep in healthy children. *PLOS ONE*. 2020;15(9):e0237719. doi:10.1371/journal.pone.0237719

17. Moreno-Pino F, Porras-Segovia A, López-Esteban P, Artés A, Baca-García E. Validation of Fitbit Charge 2 and Fitbit Alta HR Against Polysomnography for Assessing Sleep in Adults With Obstructive Sleep Apnea. *J Clin Sleep Med JCSM Off Publ Am Acad Sleep Med*. 2019;15(11):1645-1653. doi:10.5664/jcsm.8032
